# Supplementary material
Source: PubMed Central journal article supplement (PMC4285372)
Supplement: NIHMS648482-supplement-Supp_DataS1.pdf [file NIHMS648482-supplement-Supp_DataS1.pdf]

**Data Supplement 1****ED DISCHARGE DIAGNOSIS USED TO IDENTIFY  
SUSPECTED MISSED AMI**

| <u>ICD-9 Code</u> | <u>Diagnosis</u>                     |
|-------------------|--------------------------------------|
|                   | <b>Chest Pain</b>                    |
| 5110              | Pleurisy                             |
| 78650             | Unspecified Chest Pain               |
| 78651             | Precordial Pain                      |
| 78652             | Painful Respiration                  |
| 78659             | Other Chest Pain                     |
| 7871              | Heartburn                            |
|                   | <b>Respiratory Symptoms</b>          |
| 78605             | Shortness of Breath                  |
| 78606             | Tachypnea                            |
|                   | <b>Gastritis/Esophagitis</b>         |
| 5300              | Achalasia/Cardiospasm                |
| 5301              | Esophagitis, Unspecified             |
| 53010             | Esophagitis                          |
| 53011             | Esophagitis                          |
| 53012             | Esophagitis                          |
| 53019             | Esophagitis                          |
| 53081             | Esophageal Reflux                    |
| 5350              | Acute Gastritis                      |
| 53500             | Gastritis and Duodenitis             |
| 53510             | Gastritis and Duodenitis             |
| 5352              | Gastric Mucosal Hypertrophy          |
| 53520             | Gastritis and Duodenitis             |
| 5354              | Other Specified Gastritis            |
| 53540             | Gastritis and Duodenitis             |
| 5355              | Unspecified Gastritis and Duodenitis |
| 53550             | Gastritis and Duodenitis             |
| 5356              | Duodenitis                           |
| 53560             | Gastritis and Duodenitis             |
| 5360              | Achlorhydria                         |
| 5362              | Persistent Vomiting                  |
| 5363              | Gastroparesis                        |
| 53781             | Pylorospasm                          |
| V1271             | History of Peptic Ulcer Disease      |

|       |                                                 |
|-------|-------------------------------------------------|
|       | <b>Other</b>                                    |
| 7802  | Syncope and Collapse                            |
| 79431 | Nonspecific Abnormal EKG                        |
| 78906 | Epigastric Abdominal Pain                       |
|       | <b>Symptomatic Coronary Disease</b>             |
| 4110  | Post MI Syndrome                                |
| 4111  | Intermediate Coronary Syndrome                  |
| 4118  | Other Acute and Subacute Ischemic Heart Disease |
| 41181 | Acute Coronary Occlusion without MI             |
| 41189 | Other Acute and Subacute Ischemic Heart Disease |
| 4130  | Angina Decubitus                                |
| 4131  | Prinzmetal Angina                               |
| 4139  | Angina Pectoris                                 |
|       | <b>Congestive Heart Failure</b>                 |
| 39891 | Rheumatic Heart Failure (Congestive)            |
| 4280  | Congestive Heart Failure, Unspecified           |
| 4281  | Left Heart Failure                              |
| 42820 | Systolic Heart Failure                          |
| 42821 | Systolic Heart Failure                          |
| 42822 | Systolic Heart Failure                          |
| 42823 | Systolic Heart Failure                          |
| 42830 | Diastolic Heart Failure                         |
| 42831 | Diastolic Heart Failure                         |
| 42832 | Diastolic Heart Failure                         |
| 42833 | Diastolic Heart Failure                         |
| 42840 | Combined Systolic and Diastolic Heart Failure   |
| 42841 | Combined Systolic and Diastolic Heart Failure   |
| 42842 | Combined Systolic and Diastolic Heart Failure   |
| 42843 | Combined Systolic and Diastolic Heart Failure   |
| 4289  | Heart Failure, Unspecified                      |
| 4292  | Cardiovascular Disease, Unspecified             |
| 4293  | Cardiomegaly                                    |
| 42982 | Hyperkinetic Heart Disease                      |
| 42983 | Takotsubo Syndrome                              |
| 42989 | Other Ill Defined Heart Disease                 |
| 4299  | Heart Disease, Unspecified                      |
|       | <b>Coronary Artery Disease</b>                  |
| 412   | Old MI                                          |
| 4140  | Coronary Atherosclerosis                        |

|       |                                      |
|-------|--------------------------------------|
| 41400 | Coronary Atherosclerosis             |
| 41401 | Coronary Atherosclerosis             |
| 41402 | Coronary Atherosclerosis             |
| 41403 | Coronary Atherosclerosis             |
| 41404 | Coronary Atherosclerosis             |
| 41405 | Coronary Atherosclerosis             |
| 41406 | Coronary Atherosclerosis             |
| 4142  | Chronic Coronary Artery Occlusion    |
| 4143  | Coronary Atherosclerosis from Lipid  |
| 4148  | Other Chronic Ischemic Heart Disease |
| 4149  | Chronic Ischemic Heart Disease       |
