# Supplementary material
Source: PubMed Central journal article supplement (PMC4285372)
Supplement: NIHMS648482-supplement-Supp_DataS2.pdf [file NIHMS648482-supplement-Supp_DataS2.pdf]

**Data Supplement 2**  
**FULL REGRESSION RESULTS**

|                                        | Readmit |    | Costs   |    | Deflated Costs |    |
|----------------------------------------|---------|----|---------|----|----------------|----|
|                                        | AOR     |    | Ln Cost |    | Ln Cost        |    |
| <b><u>HOSPITAL CHARACTERISTICS</u></b> | (SE)    |    | (SE)    |    | (SE)           |    |
| <b>ED Specific</b>                     |         |    |         |    |                |    |
| Percent ABEM Certified                 | 0.6     | ** | 0.21    | ** | 0.08           | ** |
|                                        | -0.04   |    | 0.02    |    | 0.01           |    |
| Percent US Trained                     | 0.92    |    | -0.03   |    | 0.00           |    |
|                                        | -0.06   |    | 0.02    |    | 0.01           |    |
| EM Residency                           | 1.05    |    | 0.16    | ** | 0.17           | ** |
|                                        | -0.13   |    | 0.03    |    | 0.02           |    |
| Chest Pain Acuity                      | 0.23    | ** | 0.43    | ** | 0.27           | ** |
|                                        | -0.02   |    | 0.02    |    | 0.02           |    |
| Chest Pain Volume (2)                  | 0.68    | ** | 0.14    | ** | 0.06           | ** |
|                                        | -0.05   |    | 0.02    |    | 0.02           |    |
| Chest Pain Volume (3)                  | 0.65    | ** | 0.16    | ** | 0.07           | ** |
|                                        | -0.06   |    | 0.02    |    | 0.02           |    |
| Chest Pain Volume (4)                  | 0.7     | ** | 0.13    | ** | 0.09           | ** |
|                                        | -0.07   |    | 0.03    |    | 0.02           |    |
| Chest Pain Volume (5)                  | 10.04   | ** | -0.39   | ** | -0.28          | ** |
|                                        | -3.49   |    | 0.10    |    | 0.11           |    |
| Average Years in Practice              | 0.93    |    | 0.04    |    | 0.02           |    |
|                                        | -0.05   |    | 0.02    |    | 0.01           |    |
| Percent Men                            | 0.98    |    | -0.02   |    | -0.02          |    |
|                                        | -0.06   |    | 0.01    |    | 0.01           |    |
| <b>Hospital-Wide</b>                   |         |    |         |    |                |    |
| Cardiac Catheterization Hospital       | 0.87    |    | 0.19    | ** | 0.21           | ** |
|                                        | -0.08   |    | 0.03    |    | 0.02           |    |
| Cardiac Intensive Care Unit Hospital   | 1.05    |    | 0.04    |    | 0.05           | ** |
|                                        | -0.08   |    | 0.02    |    | 0.02           |    |
| Level of Technology (2)                | 0.7     | ** | 0.17    | ** | 0.11           | ** |
|                                        | -0.08   |    | 0.03    |    | 0.03           |    |
| Level of Technology (3)                | 0.65    | ** | 0.23    | ** | 0.20           | ** |
|                                        | -0.05   |    | 0.02    |    | 0.02           |    |
| Level of Technology (4)                | 0.51    | ** | 0.24    | ** | 0.19           | ** |
|                                        | -0.05   |    | 0.03    |    | 0.02           |    |
| Level of Technology (5)                | 0.61    | ** | 0.24    | ** | 0.23           | ** |
|                                        | -0.08   |    | 0.03    |    | 0.03           |    |
| Medium Bed Size                        | 0.5     | ** | 0.23    | ** | 0.09           | ** |
|                                        | -0.04   |    | 0.02    |    | 0.02           |    |

|                                      |       |    |       |    |       |    |
|--------------------------------------|-------|----|-------|----|-------|----|
| Large Bed Size                       | 0.46  | ** | 0.32  | ** | 0.16  | ** |
|                                      | -0.04 |    | 0.02  |    | 0.02  |    |
| Med School Affiliation               | 0.66  | ** | 0.14  | ** | 0.07  | ** |
|                                      | -0.06 |    | 0.03  |    | 0.02  |    |
| Med School and Residency Affiliation | 0.74  | ** | 0.26  | ** | 0.20  | ** |
|                                      | -0.07 |    | 0.02  |    | 0.02  |    |
| Micropolitan Area                    | 1.47  | ** | -0.28 | ** | -0.15 | ** |
|                                      | -0.13 |    | 0.02  |    | 0.02  |    |
| Small Town                           | 2.12  | ** | -0.44 | ** | -0.19 | ** |
|                                      | -0.21 |    | 0.03  |    | 0.02  |    |
| Rural                                | 2.61  | ** | -0.53 | ** | -0.16 | ** |
|                                      | -0.35 |    | 0.04  |    | 0.04  |    |
| Private Hospital                     | 0.92  |    | 0.11  | ** | 0.09  | ** |
|                                      | -0.08 |    | 0.02  |    | 0.02  |    |
| Public Hospital                      | 1.32  | ** | 0.00  |    | 0.02  |    |
|                                      | -0.1  |    | 0.02  |    | 0.02  |    |
| Trauma Hospital                      | 0.9   |    | 0.04  |    | 0.05  | ** |
|                                      | -0.06 |    | 0.02  |    | 0.01  |    |

**PATIENT CHARACTERISTICS****Demographics**

|               |       |    |       |    |       |    |
|---------------|-------|----|-------|----|-------|----|
| 70-74 (Women) | 0.87  |    | 0.00  |    | 0.00  |    |
|               | -0.08 |    | 0.01  |    | 0.01  |    |
| 75-79 (Women) | 0.85  |    | -0.01 |    | -0.01 |    |
|               | -0.07 |    | 0.01  |    | 0.01  |    |
| 80-84 (Women) | 0.68  | ** | -0.03 | ** | -0.04 | ** |
|               | -0.06 |    | 0.01  |    | 0.01  |    |
| 85-89 (Women) | 0.62  | ** | -0.08 | ** | -0.09 | ** |
|               | -0.05 |    | 0.01  |    | 0.01  |    |
| 90-94 (Women) | 0.56  | ** | -0.13 | ** | -0.15 | ** |
|               | -0.05 |    | 0.01  |    | 0.01  |    |
| 95-99 (Women) | 0.41  | ** | -0.16 | ** | -0.17 | ** |
|               | -0.06 |    | 0.01  |    | 0.01  |    |
| > 99 (Women)  | 0.33  | ** | -0.17 | ** | -0.18 | ** |
|               | -0.11 |    | 0.02  |    | 0.02  |    |
| 70-74 (Men)   | 1.05  |    | 0.00  |    | 0.01  |    |
|               | -0.12 |    | 0.01  |    | 0.01  |    |
| 75-79 (Men)   | 1.2   |    | -0.01 |    | -0.01 |    |
|               | -0.13 |    | 0.01  |    | 0.01  |    |
| 80-84 (Men)   | 1.32  |    | -0.02 |    | -0.02 |    |
|               | -0.15 |    | 0.01  |    | 0.01  |    |
| 85-89 (Men)   | 1.36  | ** | -0.03 |    | -0.03 | ** |
|               | -0.16 |    | 0.01  |    | 0.01  |    |

|                               |       |    |       |    |       |    |
|-------------------------------|-------|----|-------|----|-------|----|
| 90-94 (Men)                   | 1.3   |    | -0.04 | ** | -0.04 | ** |
|                               | -0.18 |    | 0.01  |    | 0.01  |    |
| 95-99 (Men)                   | 1.34  |    | -0.03 |    | -0.03 |    |
|                               | -0.34 |    | 0.02  |    | 0.02  |    |
| > 99 (Men)                    | 1.46  |    | -0.07 |    | -0.07 |    |
|                               | -1.01 |    | 0.04  |    | 0.04  |    |
| Male                          | 0.83  |    | 0.05  | ** | 0.05  | ** |
|                               | -0.07 |    | 0.01  |    | 0.01  |    |
| African American              | 1.26  | ** | -0.04 | ** | -0.05 | ** |
|                               | -0.08 |    | 0.00  |    | 0.00  |    |
| Other Race                    | 0.91  |    | 0.01  |    | 0.01  |    |
|                               | -0.18 |    | 0.01  |    | 0.01  |    |
| Asian                         | 1.05  |    | 0.02  |    | 0.02  |    |
|                               | -0.2  |    | 0.01  |    | 0.01  |    |
| Hispanic                      | 1.18  |    | 0.00  |    | 0.00  |    |
|                               | -0.14 |    | 0.01  |    | 0.01  |    |
| Native American               | 1.44  |    | -0.04 |    | -0.03 |    |
|                               | -0.31 |    | 0.02  |    | 0.02  |    |
| Socioeconomic Level           | 0.97  |    | 0.00  |    | 0.00  |    |
|                               | -0.05 |    | 0.00  |    | 0.00  |    |
| <b>Comorbidities</b>          |       |    |       |    |       |    |
| Congestive Heart Failure      | 0.59  | ** | 0.14  | ** | 0.14  | ** |
|                               | -0.02 |    | 0.00  |    | 0.00  |    |
| Valvular Heart Disease        | 0.92  |    | 0.01  |    | 0.01  |    |
| Cardiac Arrhythmias           | -0.04 |    | 0.00  |    | 0.00  |    |
| Pulm. Circulatory Disorder    | 1.09  |    | -0.04 | ** | -0.04 | ** |
|                               | -0.1  |    | 0.01  |    | 0.01  |    |
| Peripheral Vascular Disorders | 1.12  |    | -0.04 | ** | -0.04 | ** |
|                               | -0.05 |    | 0.00  |    | 0.00  |    |
| Hypertension                  | 0.55  | ** | -0.04 | ** | -0.04 | ** |
|                               | -0.02 |    | 0.00  |    | 0.00  |    |
| Paralysis                     | 0.82  |    | -0.02 | ** | -0.02 | ** |
|                               | -0.08 |    | 0.01  |    | 0.01  |    |
| Other Neurologic Disorder     | 0.62  | ** | -0.02 | ** | -0.03 | ** |
|                               | -0.04 |    | 0.00  |    | 0.00  |    |
| Chronic Pulmonary Disease     | 0.85  | ** | 0.00  |    | -0.01 |    |
|                               | -0.03 |    | 0.00  |    | 0.00  |    |
| Diabetes, Uncomplicated       | 0.87  | ** | -0.03 | ** | -0.03 | ** |
|                               | -0.03 |    | 0.00  |    | 0.00  |    |
| Diabetes, Complicated         | 1.3   | ** | -0.04 | ** | -0.04 | ** |
|                               | -0.08 |    | 0.00  |    | 0.00  |    |
| Hypothyroidism                | 0.82  | ** | -0.01 | ** | -0.02 | ** |
|                               | -0.04 |    | 0.00  |    | 0.00  |    |

|                                        |                  |    |                  |    |                  |    |
|----------------------------------------|------------------|----|------------------|----|------------------|----|
| Renal Failure                          | 0.96             |    | -0.01            |    | -0.01            |    |
|                                        | -0.05            |    | 0.00             |    | 0.00             |    |
| Liver Disease                          | 1.06             |    | -0.08            | ** | -0.08            | ** |
|                                        | -0.2             |    | 0.01             |    | 0.01             |    |
| Peptic Ulcer Disease                   | 0.98             |    | -0.03            | ** | -0.03            | ** |
|                                        | -0.1             |    | 0.01             |    | 0.01             |    |
| AIDS                                   | 0                |    | -0.02            |    | -0.02            |    |
|                                        | 0                |    | 0.08             |    | 0.08             |    |
| Lymphoma                               | 0.82             |    | -0.04            | ** | -0.04            | ** |
|                                        | -0.17            |    | 0.01             |    | 0.01             |    |
| Metastatic Cancer                      | 1.2              |    | -0.04            |    | -0.04            |    |
|                                        | -0.29            |    | 0.02             |    | 0.02             |    |
| Solid Tumor without Metastases         | 0.82             | ** | -0.03            | ** | -0.03            | ** |
|                                        | -0.04            |    | 0.00             |    | 0.00             |    |
| Arthritis/Collagen Vascular Disease    | 0.99             |    | -0.02            | ** | -0.02            | ** |
|                                        | -0.1             |    | 0.01             |    | 0.01             |    |
| Coagulopathy                           | 0.96             |    | 0.15             | ** | 0.15             | ** |
|                                        | -0.06            |    | 0.00             |    | 0.00             |    |
| Obesity                                | 0.97             |    | 0.00             |    | 0.00             |    |
|                                        | -0.07            |    | 0.01             |    | 0.01             |    |
| Weight Loss                            | 0.86             |    | 0.04             | ** | 0.04             | ** |
|                                        | -0.09            |    | 0.01             |    | 0.01             |    |
| Fluid, Electrolyte Disorder            | 0.83             | ** | 0.03             | ** | 0.02             | ** |
|                                        | -0.03            |    | 0.00             |    | 0.00             |    |
| Blood Loss Anemia                      | <i>(omitted)</i> |    | <i>(omitted)</i> |    | <i>(omitted)</i> |    |
| Deficiency Anemia                      | 1.07             |    | -0.13            | ** | -0.13            | ** |
|                                        | -0.07            |    | 0.00             |    | 0.00             |    |
| Alcohol Abuse                          | 0.84             |    | 0.01             |    | 0.01             |    |
|                                        | -0.11            |    | 0.01             |    | 0.01             |    |
| Drug Abuse                             | 2.01             | ** | -0.08            | ** | -0.08            | ** |
|                                        | -0.43            |    | 0.02             |    | 0.02             |    |
| Psychosis                              | 1.02             |    | -0.03            | ** | -0.04            | ** |
|                                        | -0.1             |    | 0.01             |    | 0.01             |    |
| Depression                             | 1.05             |    | -0.04            | ** | -0.04            | ** |
|                                        | -0.07            |    | 0.00             |    | 0.00             |    |
| <b><u>REGIONAL CHARACTERISTICS</u></b> |                  |    |                  |    |                  |    |
| Mid Atlantic                           | 0.45             | ** | 0.06             |    | 0.08             |    |
|                                        | -0.07            |    | 0.04             |    | 0.03             |    |
| South Atlantic                         | 0.66             |    | -0.04            |    | 0.07             |    |
|                                        | -0.1             |    | 0.04             |    | 0.03             |    |
| East North Central                     | 0.96             |    | -0.04            |    | 0.10             | ** |

|                                        |       |    |       |    |      |    |
|----------------------------------------|-------|----|-------|----|------|----|
|                                        | -0.14 |    | 0.04  |    | 0.03 |    |
| East South Central                     | 0.85  |    | 0.05  |    | 0.19 | ** |
|                                        | -0.14 |    | 0.05  |    | 0.04 |    |
| West North Central                     | 1.24  |    | -0.20 | ** | 0.08 |    |
|                                        | -0.2  |    | 0.05  |    | 0.04 |    |
| West South Central                     | 0.63  | ** | 0.11  | ** | 0.21 | ** |
|                                        | -0.1  |    | 0.04  |    | 0.03 |    |
| Mountain                               | 0.43  | ** | 0.15  | ** | 0.18 | ** |
|                                        | -0.09 |    | 0.05  |    | 0.04 |    |
| Pacific                                | 0.98  |    | 0.03  |    | 0.07 |    |
|                                        | -0.2  |    | 0.05  |    | 0.04 |    |
| Associated Areas                       | 0.35  | ** | -0.33 | ** | 0.18 |    |
|                                        | -0.09 |    | 0.08  |    | 0.06 |    |
| <b><u>TEMPORAL CHARACTERISTICS</u></b> |       |    |       |    |      |    |
| <b>Weekday</b>                         |       |    |       |    |      |    |
| Monday                                 | 0.96  |    | 0.01  |    | 0.01 |    |
|                                        | -0.06 |    | 0.00  |    | 0.00 |    |
| Tuesday                                | 0.93  |    | 0.01  |    | 0.01 |    |
|                                        | -0.06 |    | 0.00  |    | 0.00 |    |
| Wednesday                              | 1     |    | 0.01  |    | 0.01 |    |
|                                        | -0.06 |    | 0.00  |    | 0.00 |    |
| Thursday                               | 1     |    | 0.02  | ** | 0.02 | ** |
|                                        | -0.06 |    | 0.00  |    | 0.00 |    |
| Friday                                 | 0.95  |    | 0.04  | ** | 0.03 | ** |
|                                        | -0.06 |    | 0.00  |    | 0.00 |    |
| Saturday                               | 1.03  |    | 0.02  | ** | 0.02 | ** |
|                                        | -0.06 |    | 0.00  |    | 0.00 |    |
| <b>Season</b>                          |       |    |       |    |      |    |
| Spring                                 | 1     |    | 0.00  |    | 0.00 |    |
|                                        | -0.04 |    | 0.00  |    | 0.00 |    |
| Summer                                 | 1.08  |    | 0.01  |    | 0.01 | ** |
|                                        | -0.05 |    | 0.00  |    | 0.00 |    |
| Fall                                   | 0.97  |    | 0.04  | ** | 0.04 | ** |
|                                        | -0.04 |    | 0.00  |    | 0.00 |    |
| <b>Intercept</b>                       |       |    |       |    |      |    |
|                                        | 0.53  | ** | 7.71  | ** | 8.03 | ** |
|                                        | -0.11 |    | 0.05  |    | 0.04 |    |

\*\* = Statistically Significant, p&lt;0.01
