# Supplementary material
Source: PubMed Central journal article supplement (PMC4285372)
Supplement: NIHMS648482-supplement-Supp_DataS3.pdf [file NIHMS648482-supplement-Supp_DataS3.pdf]

| <b>Data Supplement 3</b>                            |         |    |        |    |
|-----------------------------------------------------|---------|----|--------|----|
| <b>REGRESSION RESULTS EXCLUDING SAME DAY MISSES</b> |         |    |        |    |
|                                                     | Readmit |    | Costs  |    |
|                                                     | †       |    | †      |    |
|                                                     | OR      |    | Ln     |    |
|                                                     | (SE)    |    | Cost   |    |
| <b><u>HOSPITAL CHARACTERISTICS</u></b>              |         |    | (SE)   |    |
| <b>ED Specific</b>                                  |         |    |        |    |
| Percent ABEM Certified                              | 0.74    | ** | 0.24   | ** |
|                                                     | (0.05)  |    | (0.02) |    |
| Percent US Trained                                  | 0.94    |    | -0.05  | ** |
|                                                     | (0.06)  |    | (0.02) |    |
| EM Residency                                        | 0.94    |    | 0.15   | ** |
|                                                     | (0.10)  |    | (0.03) |    |
| Chest Pain Acuity                                   | 0.35    | ** | 0.57   | ** |
|                                                     | (0.02)  |    | (0.02) |    |
| Chest Pain Volume (2)                               | 0.84    |    | 0.10   | ** |
|                                                     | (0.07)  |    | (0.02) |    |
| Chest Pain Volume (3)                               | 0.84    |    | 0.13   | ** |
|                                                     | (0.08)  |    | (0.02) |    |
| Chest Pain Volume (4)                               | 0.90    |    | 0.09   | ** |
|                                                     | (0.09)  |    | (0.03) |    |
| Chest Pain Volume (5)                               | 4.05    | ** | -1.14  | ** |
|                                                     | (1.64)  |    | (0.04) |    |
| Average Years in Practice                           | 0.97    |    | 0.03   |    |
|                                                     | (0.06)  |    | (0.02) |    |
| Percent Men                                         | 0.99    |    | -0.02  |    |
|                                                     | (0.06)  |    | (0.02) |    |
| <b>Hospital-Wide</b>                                |         |    |        |    |
| Cardiac Catheterization Hospital                    | 0.90    |    | 0.19   | ** |
|                                                     | (0.08)  |    | (0.03) |    |
| Cardiac Intensive Care Unit Hospital                | 1.07    |    | 0.02   |    |
|                                                     | (0.07)  |    | (0.02) |    |
| Level of Technology (2)                             | 0.69    | ** | 0.12   | ** |
|                                                     | (0.08)  |    | (0.03) |    |
| Level of Technology (3)                             | 0.73    | ** | 0.20   | ** |
|                                                     | (0.06)  |    | (0.02) |    |
| Level of Technology (4)                             | 0.61    | ** | 0.21   | ** |
|                                                     | (0.06)  |    | (0.03) |    |
| Level of Technology (5)                             | 0.67    | ** | 0.23   | ** |
|                                                     | (0.08)  |    | (0.04) |    |

|                                       |        |    |        |    |
|---------------------------------------|--------|----|--------|----|
| Medium Bed Size                       | 0.63   | ** | 0.21   | ** |
|                                       | (0.05) |    | (0.02) |    |
| Large Bed Size                        | 0.59   | ** | 0.30   | ** |
|                                       | (0.05) |    | (0.02) |    |
| Med School Affiliation                | 0.77   | ** | 0.14   | ** |
|                                       | (0.07) |    | (0.03) |    |
| Med School and Residency Affiliation  | 0.83   |    | 0.26   | ** |
|                                       | (0.07) |    | (0.03) |    |
| Micropolitan Area                     | 1.17   |    | -0.29  | ** |
|                                       | (0.09) |    | (0.02) |    |
| Small Town                            | 1.39   | ** | -0.46  | ** |
|                                       | (0.14) |    | (0.03) |    |
| Rural                                 | 1.49   | ** | -0.54  | ** |
|                                       | (0.22) |    | (0.04) |    |
| Private Hospital                      | 0.91   |    | 0.16   | ** |
|                                       | (0.08) |    | (0.03) |    |
| Public Hospital                       | 1.25   | ** | -0.01  |    |
|                                       | (0.09) |    | (0.02) |    |
| Trauma Hospital                       | 0.91   |    | 0.05   |    |
|                                       | (0.06) |    | (0.02) |    |
| <b><u>PATIENT CHARACTERISTICS</u></b> |        |    |        |    |
| <b>Demographics</b>                   |        |    |        |    |
| 70-74 (Women)                         | 0.92   |    | 0.00   |    |
|                                       | (0.10) |    | (0.01) |    |
| 75-79 (Women)                         | 0.99   |    | -0.03  | ** |
|                                       | (0.10) |    | (0.01) |    |
| 80-84 (Women)                         | 0.86   |    | -0.08  | ** |
|                                       | (0.09) |    | (0.01) |    |
| 85-89 (Women)                         | 0.84   |    | -0.16  | ** |
|                                       | (0.09) |    | (0.01) |    |
| 90-94 (Women)                         | 0.96   |    | -0.25  | ** |
|                                       | (0.11) |    | (0.01) |    |
| 95-99 (Women)                         | 0.73   |    | -0.35  | ** |
|                                       | (0.12) |    | (0.01) |    |
| > 99 (Women)                          | 0.57   |    | -0.43  | ** |
|                                       | (0.21) |    | (0.02) |    |
| 70-74 (Men)                           | 1.01   |    | -0.01  |    |
|                                       | (0.14) |    | (0.01) |    |
| 75-79 (Men)                           | 1.12   |    | -0.02  |    |
|                                       | (0.15) |    | (0.01) |    |
| 80-84 (Men)                           | 1.31   |    | -0.03  | ** |
|                                       | (0.18) |    | (0.01) |    |

|                              |                |    |                 |    |
|------------------------------|----------------|----|-----------------|----|
| 85-89 (Men)                  | 1.39<br>(0.20) |    | -0.05<br>(0.01) | ** |
| 90-94 (Men)                  | 1.23<br>(0.20) |    | -0.07<br>(0.01) | ** |
| 95-99 (Men)                  | 1.49<br>(0.40) |    | -0.06<br>(0.02) | ** |
| > 99 (Men)                   | 1.87<br>(1.31) |    | -0.11<br>(0.05) |    |
| Male                         | 0.80<br>(0.08) |    | 0.07<br>(0.01)  | ** |
| African American             | 1.40<br>(0.10) | ** | -0.06<br>(0.01) | ** |
| Other Race                   | 0.98<br>(0.22) |    | -0.01<br>(0.02) |    |
| Asian                        | 0.91<br>(0.20) |    | 0.04<br>(0.02)  | ** |
| Hispanic                     | 1.21<br>(0.16) |    | 0.00<br>(0.01)  |    |
| Native American              | 1.55<br>(0.40) |    | -0.04<br>(0.03) |    |
| Socioeconomic Level          | 0.86<br>(0.05) | ** | 0.02<br>(0.00)  | ** |
| <b>Comorbidities</b>         |                |    |                 |    |
| Congestive Heart Failure     | 0.42<br>(0.02) | ** | 0.18<br>(0.00)  | ** |
| Cardiac Arrhythmias          | 0.65<br>(0.04) | ** | 0.04<br>(0.00)  | ** |
| Valvular Heart Disease       | 1.29<br>(0.15) |    | -0.13<br>(0.01) | ** |
| Pulm. Circulatory Disorder   | 1.04<br>(0.06) |    | -0.03<br>(0.00) | ** |
| Peripheral Vascular Disorder | 0.39<br>(0.02) | ** | 0.05<br>(0.00)  | ** |
| Hypertension                 | 0.86<br>(0.10) |    | -0.05<br>(0.01) | ** |
| Paralysis                    | 0.58<br>(0.04) | ** | -0.06<br>(0.00) | ** |
| Other Neurologic Disorder    | 0.81<br>(0.04) | ** | -0.03<br>(0.00) | ** |
| Chronic Pulmonary Disease    | 0.83<br>(0.04) | ** | -0.01<br>(0.00) | ** |
| Diabetes, Uncomplicated      | 1.60<br>(0.11) | ** | -0.06<br>(0.01) | ** |

|                                        |             |    |             |    |
|----------------------------------------|-------------|----|-------------|----|
| Diabetes, Complicated                  | 0.71        | ** | -0.01       |    |
|                                        | (0.05)      |    | (0.00)      |    |
| Hypothyroidism                         | 0.78        | ** | -0.01       |    |
|                                        | (0.05)      |    | (0.00)      |    |
| Renal Failure                          | 1.04        |    | -0.22       | ** |
|                                        | (0.25)      |    | (0.02)      |    |
| Liver Disease                          | 1.02        |    | -0.03       | ** |
|                                        | (0.13)      |    | (0.01)      |    |
| Peptic Ulcer Disease                   | 0.00        |    | -0.11       |    |
|                                        | (0.00)      |    | (0.11)      |    |
| AIDS                                   | 0.66        |    | -0.11       | ** |
|                                        | (0.18)      |    | (0.02)      |    |
| Lymphoma                               | 1.04        |    | -0.14       | ** |
|                                        | (0.34)      |    | (0.02)      |    |
| Metastatic Cancer                      | 0.73        | ** | -0.07       | ** |
|                                        | (0.05)      |    | (0.00)      |    |
| Solid Tumor without Metastases         | 1.07        |    | -0.02       |    |
|                                        | (0.12)      |    | (0.01)      |    |
| Arthritis/Collagen Vascular Disease    | 0.77        | ** | 0.14        | ** |
|                                        | (0.06)      |    | (0.00)      |    |
| Coagulopathy                           | 0.89        |    | 0.00        |    |
|                                        | (0.09)      |    | (0.01)      |    |
| Obesity                                | 0.94        |    | -0.09       | ** |
|                                        | (0.12)      |    | (0.01)      |    |
| Weight Loss                            | 0.82        | ** | -0.01       | ** |
|                                        | (0.04)      |    | (0.00)      |    |
| Fluid, Electrolyte Disorder            | 1.00        |    | 1.00        |    |
|                                        | <i>omit</i> |    | <i>omit</i> |    |
| Blood Loss Anemia                      | 1.27        | ** | -0.14       | ** |
|                                        | (0.10)      |    | (0.01)      |    |
| Deficiency Anemia                      | 0.74        |    | 0.01        |    |
|                                        | (0.13)      |    | (0.01)      |    |
| Alcohol Abuse                          | 2.68        | ** | -0.08       | ** |
|                                        | (0.62)      |    | (0.02)      |    |
| Drug Abuse                             | 1.18        |    | -0.07       | ** |
|                                        | (0.14)      |    | (0.01)      |    |
| Psychosis                              | 1.12        |    | -0.07       | ** |
|                                        | (0.09)      |    | (0.01)      |    |
| <b><u>REGIONAL CHARACTERISTICS</u></b> |             |    |             |    |
| Mid Atlantic                           | 0.59        | ** | 0.13        | ** |
|                                        | (0.09)      |    | (0.05)      |    |
| South Atlantic                         | 0.90        |    | 0.02        |    |

|                                               |        |        |      |   |
|-----------------------------------------------|--------|--------|------|---|
|                                               | (0.12) | (0.04) |      |   |
| East North Central                            | 1.08   | -0.02  |      |   |
|                                               | (0.15) | (0.04) |      |   |
| East South Central                            | 1.16   | 0.13   | **   |   |
|                                               | (0.18) | (0.05) |      |   |
| West North Central                            | 1.09   | -0.20  | **   |   |
|                                               | (0.17) | (0.05) |      |   |
| West South Central                            | 0.79   | 0.18   | **   |   |
|                                               | (0.12) | (0.05) |      |   |
| Mountain                                      | 0.56   | **     | 0.06 |   |
|                                               | (0.11) | (0.05) |      |   |
| Pacific                                       | 0.92   | 0.04   |      |   |
|                                               | (0.17) | (0.06) |      |   |
| Associated Areas                              | 0.70   | -0.29  | **   |   |
|                                               | (0.17) | (0.08) |      |   |
| <b><u>TEMPORAL CHARACTERISTICS</u></b>        |        |        |      |   |
| <b>Weekday</b>                                |        |        |      |   |
| Monday                                        | 1.03   | 0.00   |      |   |
|                                               | (0.07) | (0.01) |      |   |
| Tuesday                                       | 1.00   | 0.00   |      |   |
|                                               | (0.07) | (0.01) |      |   |
| Wednesday                                     | 1.07   | 0.00   |      |   |
|                                               | (0.07) | (0.01) |      |   |
| Thursday                                      | 1.09   | 0.00   |      |   |
|                                               | (0.08) | (0.01) |      |   |
| Friday                                        | 1.00   | 0.02   | **   |   |
|                                               | (0.07) | (0.01) |      |   |
| Saturday                                      | 1.00   | 0.01   |      |   |
|                                               | (0.07) | (0.01) |      |   |
| <b>Season</b>                                 |        |        |      |   |
| Spring                                        | 1.06   | 0.01   |      |   |
|                                               | (0.05) | (0.00) |      |   |
| Summer                                        | 1.09   | 0.01   | **   |   |
|                                               | (0.06) | (0.00) |      |   |
| Fall                                          | 0.94   | 0.05   | **   |   |
|                                               | (0.05) | (0.00) |      |   |
| <b>Intercept</b>                              | 0.19   | **     | 7.48 | 0 |
|                                               | (0.04) | (0.05) |      |   |
| † = Same day readmissions and deaths excluded |        |        |      |   |
| ** = Statistically Significant, p<0.01        |        |        |      |   |
