# Supplementary material
Source: PubMed Central journal article supplement (PMC4285372)
Supplement: NIHMS648482-supplement-Supp_DataS4.pdf [file NIHMS648482-supplement-Supp_DataS4.pdf]

**Data Supplement 4****MISSINGNESS SENSITIVITY ANALYSIS****QUALITY INDICATORS**

SI = Single Imputation with Dummies

CCA = Complete Case Analysis

MI = Multiple Imputation

|                                        | <b>AMI Readmission</b> |    |            |    |           |    |
|----------------------------------------|------------------------|----|------------|----|-----------|----|
|                                        | <b>SI</b>              |    | <b>CCA</b> |    | <b>MI</b> |    |
|                                        | AOR                    |    | AOR        |    | AOR       |    |
|                                        | (SE)                   |    | (SE)       |    | (SE)      |    |
| <b><u>HOSPITAL CHARACTERISTICS</u></b> |                        |    |            |    |           |    |
| <b>ED Specific</b>                     |                        |    |            |    |           |    |
| Percent ABEM Certified                 | 0.59                   | ** | 0.54       | ** | 0.6       | ** |
|                                        | -0.04                  |    | -0.04      |    | -0.05     |    |
| Percent US Trained                     | 0.91                   |    | 0.9        |    | 0.91      |    |
|                                        | -0.06                  |    | -0.06      |    | -0.06     |    |
| EM Residency                           | 1.03                   |    | 1.03       |    | 1.02      |    |
|                                        | -0.14                  |    | -0.14      |    | -0.13     |    |
| Chest Pain Acuity                      | 0.22                   | ** | 0.21       | ** | 0.22      | ** |
|                                        | -0.01                  |    | -0.01      |    | -0.01     |    |
| Chest Pain Volume (2)                  | 0.66                   | ** | 0.64       | ** | 1.45      | ** |
|                                        | -0.05                  |    | -0.05      |    | -0.15     |    |
| Chest Pain Volume (3)                  | 0.6                    | ** | 0.54       | ** | 1.01      |    |
|                                        | -0.05                  |    | -0.05      |    | -0.09     |    |
| Chest Pain Volume (4)                  | 0.64                   | ** | 0.58       | ** | 0.9       |    |
|                                        | -0.07                  |    | -0.06      |    | -0.07     |    |
| Chest Pain Volume (5)                  | 9.81                   | ** | 10.35      | ** | 1         |    |
|                                        | -3.43                  |    | -3.64      |    | (omit)    |    |
| Average Years in Practice              | 0.93                   |    | 0.94       |    | 0.94      |    |
|                                        | -0.05                  |    | -0.06      |    | -0.06     |    |
| Percent Men                            | 0.98                   |    | 0.97       |    | 1         |    |
|                                        | -0.06                  |    | -0.06      |    | -0.06     |    |
| <b>Hospital-Wide</b>                   |                        |    |            |    |           |    |
| Cardiac Catheterization Hospital       | 0.84                   |    | 0.84       |    | 0.8       | ** |
|                                        | -0.08                  |    | -0.07      |    | -0.07     |    |
| Cardiac Intensive Care Unit Hospital   | 1.05                   |    | 0.89       |    | 1.09      |    |
|                                        | -0.08                  |    | -0.06      |    | -0.07     |    |
| Level of Technology (1)                | 0.81                   | ** | 0.89       |    | 0.84      | ** |
|                                        | -0.06                  |    | -0.07      |    | -0.06     |    |
| Level of Technology (2)                | 0.81                   |    | 0.88       |    | 0.81      |    |
|                                        | -0.08                  |    | -0.08      |    | -0.07     |    |
| Level of Technology (3)                | 0.89                   |    | 0.95       |    | 0.84      |    |
|                                        | -0.13                  |    | -0.13      |    | -0.11     |    |
| Level of Technology (4)                | 1.07                   |    | 1.18       |    | 1.05      |    |

|                                       |       |    |       |    |       |    |
|---------------------------------------|-------|----|-------|----|-------|----|
|                                       | -0.22 |    | -0.24 |    | -0.2  |    |
| Level of Technology (5)               | 0.94  |    | 1.05  |    | 0.91  |    |
|                                       | -0.28 |    | -0.31 |    | -0.26 |    |
| Medium Bed Size                       | 0.49  | ** | 0.54  | ** | 0.57  | ** |
|                                       | -0.04 |    | -0.04 |    | -0.04 |    |
| Large Bed Size                        | 0.44  | ** | 0.49  | ** | 0.51  | ** |
|                                       | -0.04 |    | -0.04 |    | -0.04 |    |
| Med School Affiliation                | 0.65  | ** | 0.73  | ** | 0.91  |    |
|                                       | -0.06 |    | -0.07 |    | -0.07 |    |
| Med School and Residency Affiliation  | 0.71  | ** | 0.76  | ** | 0.83  |    |
|                                       | -0.07 |    | -0.07 |    | -0.07 |    |
| Micropolitan Area                     | 1.5   | ** | 1.24  | ** | 1.44  | ** |
|                                       | -0.13 |    | -0.1  |    | -0.12 |    |
| Small Town                            | 2.26  | ** | 1.82  | ** | 2.2   | ** |
|                                       | -0.22 |    | -0.16 |    | -0.23 |    |
| Rural                                 | 2.8   | ** | 2.26  | ** | 2.82  | ** |
|                                       | -0.38 |    | -0.29 |    | -0.4  |    |
| Private Hospital                      | 0.9   |    | 0.9   |    | 0.93  |    |
|                                       | -0.08 |    | -0.08 |    | -0.08 |    |
| Public Hospital                       | 1.34  | ** | 1.39  | ** | 1.4   | ** |
|                                       | -0.1  |    | -0.11 |    | -0.11 |    |
| Trauma Hospital                       | 0.9   |    | 0.93  |    | 0.87  |    |
|                                       | -0.06 |    | -0.06 |    | -0.05 |    |
| <b><u>PATIENT CHARACTERISTICS</u></b> |       |    |       |    |       |    |
| <b>Demographics</b>                   |       |    |       |    |       |    |
| 70-74 (Women)                         | 0.87  |    | 0.88  |    | 0.87  |    |
|                                       | -0.08 |    | -0.08 |    | -0.08 |    |
| 75-79 (Women)                         | 0.85  |    | 0.86  |    | 0.86  |    |
|                                       | -0.07 |    | -0.07 |    | -0.07 |    |
| 80-84 (Women)                         | 0.68  | ** | 0.69  | ** | 0.68  | ** |
|                                       | -0.06 |    | -0.06 |    | -0.06 |    |
| 85-89 (Women)                         | 0.62  | ** | 0.63  | ** | 0.62  | ** |
|                                       | -0.05 |    | -0.06 |    | -0.05 |    |
| 90-94 (Women)                         | 0.56  | ** | 0.56  | ** | 0.56  | ** |
|                                       | -0.05 |    | -0.05 |    | -0.05 |    |
| 95-99 (Women)                         | 0.41  | ** | 0.41  | ** | 0.41  | ** |
|                                       | -0.06 |    | -0.06 |    | -0.06 |    |
| > 99 (Women)                          | 0.33  | ** | 0.25  | ** | 0.27  | ** |
|                                       | -0.11 |    | -0.08 |    | -0.09 |    |
| 70-74 (Men)                           | 1.05  |    | 1.05  |    | 0.92  |    |
|                                       | -0.12 |    | -0.12 |    | -0.07 |    |
| 75-79 (Men)                           | 1.19  |    | 1.2   |    | 1.02  |    |

|                              |       |    |       |    |       |    |
|------------------------------|-------|----|-------|----|-------|----|
|                              | -0.13 |    | -0.13 |    | -0.07 |    |
| 80-84 (Men)                  | 1.32  |    | 1.32  |    | 0.9   |    |
|                              | -0.15 |    | -0.15 |    | -0.07 |    |
| 85-89 (Men)                  | 1.36  | ** | 1.36  | ** | 0.85  |    |
|                              | -0.16 |    | -0.16 |    | -0.07 |    |
| 90-94 (Men)                  | 1.3   |    | 1.3   |    | 0.72  | ** |
|                              | -0.18 |    | -0.19 |    | -0.08 |    |
| 95-99 (Men)                  | 1.35  |    | 1.34  |    | 0.54  | ** |
|                              | -0.34 |    | -0.34 |    | -0.11 |    |
| > 99 (Men)                   | 1.47  |    | 1.93  |    | 0.27  |    |
|                              | -1.02 |    | -1.31 |    | -0.15 |    |
| Male                         | 0.83  |    | 0.83  |    | 0.83  |    |
|                              | -0.07 |    | -0.07 |    | -0.07 |    |
| African American             | 1.26  | ** | 1.23  | ** | 1.26  | ** |
|                              | -0.08 |    | -0.08 |    | -0.08 |    |
| Other Race                   | 0.91  |    | 0.89  |    | 0.94  |    |
|                              | -0.18 |    | -0.18 |    | -0.19 |    |
| Asian                        | 1.05  |    | 0.99  |    | 1.08  |    |
|                              | -0.2  |    | -0.19 |    | -0.2  |    |
| Hispanic                     | 1.18  |    | 1.14  |    | 1.18  |    |
|                              | -0.14 |    | -0.13 |    | -0.14 |    |
| Native American              | 1.45  |    | 1.45  |    | 1.45  |    |
|                              | -0.31 |    | -0.31 |    | -0.31 |    |
| Socioeconomic Level          | 0.97  |    | 0.95  |    | 0.98  |    |
|                              | -0.05 |    | -0.05 |    | -0.05 |    |
| <b>Comorbidities</b>         |       |    |       |    |       |    |
| Congestive Heart Failure     | 0.59  | ** | 0.59  | ** | 0.59  | ** |
|                              | -0.02 |    | -0.02 |    | -0.02 |    |
| Cardiac Arrhythmias          | 0.92  |    | 0.93  |    | 0.92  |    |
|                              | -0.04 |    | -0.04 |    | -0.04 |    |
| Valvular Heart Disease       | 1.09  |    | 1.09  |    | 1.1   |    |
|                              | -0.1  |    | -0.1  |    | -0.1  |    |
| Pulm. Circulatory Disorder   | 1.12  |    | 1.12  |    | 1.13  | ** |
|                              | -0.05 |    | -0.05 |    | -0.05 |    |
| Peripheral Vascular Disorder | 0.55  | ** | 0.55  | ** | 0.55  | ** |
|                              | -0.02 |    | -0.02 |    | -0.02 |    |
| Hypertension                 | 0.82  |    | 0.83  |    | 0.83  |    |
|                              | -0.08 |    | -0.08 |    | -0.08 |    |
| Paralysis                    | 0.62  | ** | 0.63  | ** | 0.62  | ** |
|                              | -0.04 |    | -0.04 |    | -0.04 |    |
| Other Neurologic Disorder    | 0.85  | ** | 0.86  | ** | 0.85  | ** |
|                              | -0.03 |    | -0.03 |    | -0.03 |    |
| Chronic Pulmonary Disease    | 0.87  | ** | 0.87  | ** | 0.87  | ** |

|                                     |             |    |             |    |             |    |
|-------------------------------------|-------------|----|-------------|----|-------------|----|
|                                     | -0.03       |    | -0.03       |    | -0.03       |    |
| Diabetes, Uncomplicated             | 1.3         | ** | 1.3         | ** | 1.3         | ** |
|                                     | -0.08       |    | -0.08       |    | -0.08       |    |
| Diabetes, Complicated               | 0.82        | ** | 0.81        | ** | 0.81        | ** |
|                                     | -0.04       |    | -0.04       |    | -0.04       |    |
| Hypothyroidism                      | 0.96        |    | 0.96        |    | 0.96        |    |
|                                     | -0.05       |    | -0.05       |    | -0.05       |    |
| Renal Failure                       | 1.06        |    | 1.06        |    | 1.07        |    |
|                                     | -0.2        |    | -0.2        |    | -0.21       |    |
| Liver Disease                       | 0.98        |    | 0.97        |    | 0.97        |    |
|                                     | -0.1        |    | -0.1        |    | -0.1        |    |
| Peptic Ulcer Disease                | 0           |    | 0           |    | 0           |    |
|                                     | 0           |    | 0           |    | 0           |    |
| AIDS                                | 0.82        |    | 0.83        |    | 0.82        |    |
|                                     | -0.17       |    | -0.17       |    | -0.17       |    |
| Lymphoma                            | 1.2         |    | 1.18        |    | 1.19        |    |
|                                     | -0.29       |    | -0.29       |    | -0.29       |    |
| Metastatic Cancer                   | 0.82        | ** | 0.82        | ** | 0.82        | ** |
|                                     | -0.04       |    | -0.04       |    | -0.04       |    |
| Solid Tumor without Metastases      | 0.99        |    | 0.99        |    | 0.99        |    |
|                                     | -0.1        |    | -0.1        |    | -0.1        |    |
| Arthritis/Collagen Vascular Disease | 0.96        |    | 0.96        |    | 0.97        |    |
|                                     | -0.06       |    | -0.06       |    | -0.06       |    |
| Coagulopathy                        | 0.96        |    | 0.96        |    | 0.96        |    |
|                                     | -0.07       |    | -0.07       |    | -0.07       |    |
| Obesity                             | 0.86        |    | 0.85        |    | 0.86        |    |
|                                     | -0.09       |    | -0.09       |    | -0.09       |    |
| Weight Loss                         | 0.83        | ** | 0.83        | ** | 0.83        | ** |
|                                     | -0.03       |    | -0.03       |    | -0.03       |    |
| Fluid, Electrolyte Disorder         | 1           |    | <i>omit</i> |    | <i>omit</i> |    |
|                                     | <i>omit</i> |    |             |    |             |    |
| Blood Loss Anemia                   | 1.07        |    | 1.08        |    | 1.07        |    |
|                                     | -0.07       |    | -0.07       |    | -0.07       |    |
| Deficiency Anemia                   | 0.84        |    | 0.84        |    | 0.84        |    |
|                                     | -0.11       |    | -0.11       |    | -0.11       |    |
| Alcohol Abuse                       | 2.01        | ** | 1.98        | ** | 2           | ** |
|                                     | -0.43       |    | -0.42       |    | -0.43       |    |
| Drug Abuse                          | 1.02        |    | 1.02        |    | 1.02        |    |
|                                     | -0.1        |    | -0.1        |    | -0.1        |    |
| Psychosis                           | 1.05        |    | 1.05        |    | 1.04        |    |
|                                     | -0.07       |    | -0.07       |    | -0.07       |    |

**REGIONAL CHARACTERISTICS**

|                                        |       |    |       |       |    |
|----------------------------------------|-------|----|-------|-------|----|
| Mid Atlantic                           | 0.46  | ** | 1.09  | 0.73  | ** |
|                                        | -0.07 |    | -0.13 | -0.08 |    |
| South Atlantic                         | 0.68  |    | 1.61  | 1.08  | ** |
|                                        | -0.1  |    | -0.17 | -0.1  |    |
| East North Central                     | 0.96  |    | 2.2   | 1.45  | ** |
|                                        | -0.14 |    | -0.24 | -0.14 |    |
| East South Central                     | 0.86  |    | 2.06  | 1.4   | ** |
|                                        | -0.15 |    | -0.27 | -0.16 |    |
| West North Central                     | 1.25  |    | 2.86  | 1.94  | ** |
|                                        | -0.2  |    | -0.36 | -0.21 |    |
| West South Central                     | 0.64  | ** | 1.48  | 1.06  | ** |
|                                        | -0.1  |    | -0.18 | -0.11 |    |
| Mountain                               | 0.44  | ** | 1.05  | 0.72  |    |
|                                        | -0.09 |    | -0.18 | -0.12 |    |
| Pacific                                | 1.03  |    | 2.43  | 1.63  | ** |
|                                        | -0.21 |    | -0.42 | -0.26 |    |
| Associated Areas                       | 0.34  | ** | 1.18  | 1.41  |    |
|                                        | -0.09 |    | -0.28 | -0.33 |    |
| <b><u>TEMPORAL CHARACTERISTICS</u></b> |       |    |       |       |    |
| <b>Weekday</b>                         |       |    |       |       |    |
| Monday                                 | 0.96  |    | 0.96  | 1.04  |    |
|                                        | -0.06 |    | -0.06 | -0.06 |    |
| Tuesday                                | 0.93  |    | 0.93  | 0.97  |    |
|                                        | -0.06 |    | -0.06 | -0.06 |    |
| Wednesday                              | 1     |    | 1     | 1.04  |    |
|                                        | -0.06 |    | -0.06 | -0.06 |    |
| Thursday                               | 1     |    | 1     | 1.04  |    |
|                                        | -0.06 |    | -0.06 | -0.06 |    |
| Friday                                 | 0.95  |    | 0.95  | 1     |    |
|                                        | -0.06 |    | -0.06 | -0.06 |    |
| Saturday                               | 1.03  |    | 1.03  | 1.07  |    |
|                                        | -0.06 |    | -0.06 | -0.06 |    |
| <b>Season</b>                          |       |    |       |       |    |
| Spring                                 | 1     |    | 1.01  | 1.03  |    |
|                                        | -0.04 |    | -0.04 | -0.05 |    |
| Summer                                 | 1.08  |    | 1.08  | 1.04  |    |
|                                        | -0.05 |    | -0.05 | -0.05 |    |
| Fall                                   | 0.97  |    | 0.97  | 1.12  |    |
|                                        | -0.04 |    | -0.04 | -0.05 |    |
| <b>Intercept</b>                       | 0.43  | ** | 0.21  | 0.15  | ** |
|                                        | -0.09 |    | -0.03 | -0.02 |    |

\*\* = Statistically Significant,  $p < 0.01$
