# Supplementary material
Source: PubMed Central journal article supplement (PMC4285372)
Supplement: NIHMS648482-supplement-Supp_DataS5.pdf [file NIHMS648482-supplement-Supp_DataS5.pdf]

**Data Supplement 5****MISSINGNESS SENSITIVITY ANALYSIS  
HOSPITAL COSTS**SI = Single Imputation with Dummy  
Variables

CCA = Complete Case Analysis

MI = Multiple Imputation

|                                      | <b>SI</b> |    | <b>CCA</b> |    | <b>MI</b> |    |
|--------------------------------------|-----------|----|------------|----|-----------|----|
|                                      | Ln Cost   |    | Ln Cost    |    | Ln Cost   |    |
| <b>HOSPITAL CHARACTERISTICS</b>      | (SE)      |    | (SE)       |    | (SE)      |    |
| <b>ED Specific</b>                   |           |    |            |    |           |    |
| Percent ABEM Certified               | 0.26      | ** | 0.12       | ** | 0.24      | ** |
|                                      | (0.02)    |    | (0.02)     |    | (0.03)    |    |
| Percent US Trained                   | -0.03     |    | -0.03      |    | -0.01     |    |
|                                      | (0.02)    |    | (0.02)     |    | (0.03)    |    |
| EM Residency                         | 0.13      | ** | 0.08       |    | 0.11      |    |
|                                      | (0.04)    |    | (0.03)     |    | (0.06)    |    |
| Chest Pain Acuity                    | 0.65      | ** | 0.35       | ** | 0.82      | ** |
|                                      | (0.02)    |    | (0.02)     |    | (0.01)    |    |
| Chest Pain Volume (2)                | 0.14      | ** | 0.13       | ** | -0.83     | ** |
|                                      | (0.02)    |    | (0.03)     |    | (0.05)    |    |
| Chest Pain Volume (3)                | 0.20      | ** | 0.15       | ** | -1.15     | ** |
|                                      | (0.03)    |    | (0.03)     |    | (0.04)    |    |
| Chest Pain Volume (4)                | 0.18      | ** | 0.10       | ** | -1.25     | ** |
|                                      | (0.03)    |    | (0.03)     |    | (0.01)    |    |
| Chest Pain Volume (5)                | -1.06     | ** | omit       |    | omit      |    |
|                                      | (0.05)    |    |            |    |           |    |
| Average Years in Practice            | 0.02      |    | 0.02       |    | 0.02      |    |
|                                      | (0.02)    |    | (0.02)     |    | (0.03)    |    |
| Percent Men                          | -0.01     |    | -0.02      |    | -0.03     |    |
|                                      | (0.02)    |    | (0.02)     |    | (0.02)    |    |
| <b>Hospital-Wide</b>                 |           |    |            |    |           |    |
| Cardiac Catheterization Hospital     | 0.21      | ** | 0.25       | ** | 0.05      |    |
|                                      | (0.03)    |    | (0.02)     |    | (0.04)    |    |
| Cardiac Intensive Care Unit Hospital | 0.03      |    | 0.07       | ** | 0.06      | ** |
|                                      | (0.02)    |    | (0.02)     |    | (0.01)    |    |
| Level of Technology (1)              | 0.01      |    | -0.01      |    | 0.05      |    |
|                                      | (0.02)    |    | (0.02)     |    | (0.03)    |    |
| Level of Technology (2)              | 0.03      |    | 0.03       |    | -0.03     |    |
|                                      | (0.03)    |    | (0.02)     |    | (0.04)    |    |
| Level of Technology (3)              | 0.05      |    | 0.05       |    | -0.08     |    |
|                                      | (0.04)    |    | (0.03)     |    | (0.06)    |    |
| Level of Technology (4)              | 0.07      |    | 0.07       |    | 0.05      |    |

|                                       |        |    |        |    |        |    |
|---------------------------------------|--------|----|--------|----|--------|----|
|                                       | (0.06) |    | (0.05) |    | (0.09) |    |
| Level of Technology (5)               | 0.14   |    | 0.12   |    | -0.03  |    |
|                                       | (0.09) |    | (0.07) |    | (0.13) |    |
| Medium Bed Size                       | 0.22   | ** | 0.23   | ** | 0.26   | ** |
|                                       | (0.02) |    | (0.02) |    | (0.03) |    |
| Large Bed Size                        | 0.30   | ** | 0.32   | ** | 0.14   | ** |
|                                       | (0.02) |    | (0.02) |    | (0.04) |    |
| Med School Affiliation                | 0.14   | ** | 0.14   | ** | 0.06   | ** |
|                                       | (0.03) |    | (0.02) |    | (0.01) |    |
| Med School and Residency Affiliation  | 0.23   | ** | 0.26   | ** | 0.13   | ** |
|                                       | (0.03) |    | (0.02) |    | (0.02) |    |
| Micropolitan Area                     | -0.30  | ** | -0.24  | ** | -0.12  | ** |
|                                       | (0.03) |    | (0.02) |    | (0.03) |    |
| Small Town                            | -0.48  | ** | -0.49  | ** | -0.33  | ** |
|                                       | (0.03) |    | (0.03) |    | (0.04) |    |
| Rural                                 | -0.56  | ** | -0.59  | ** | -0.50  | ** |
|                                       | (0.04) |    | (0.04) |    | (0.06) |    |
| Private Hospital                      | 0.19   | ** | 0.08   | ** | 0.24   | ** |
|                                       | (0.03) |    | (0.02) |    | (0.03) |    |
| Public Hospital                       | -0.01  |    | -0.01  |    | -0.05  |    |
|                                       | (0.02) |    | (0.02) |    | (0.03) |    |
| Trauma Hospital                       | 0.05   | ** | 0.05   | ** | 0.11   | ** |
|                                       | (0.02) |    | (0.02) |    | (0.03) |    |
| <b><u>PATIENT CHARACTERISTICS</u></b> |        |    |        |    |        |    |
| <b>Demographics</b>                   |        |    |        |    |        |    |
| 70-74 (Women)                         | 0.00   |    | -0.01  |    | 0.00   |    |
|                                       | (0.01) |    | (0.01) |    | (0.01) |    |
| 75-79 (Women)                         | -0.03  | ** | -0.01  |    | -0.02  | ** |
|                                       | (0.01) |    | (0.01) |    | (0.01) |    |
| 80-84 (Women)                         | -0.08  | ** | -0.05  | ** | -0.08  | ** |
|                                       | (0.01) |    | (0.01) |    | (0.01) |    |
| 85-89 (Women)                         | -0.16  | ** | -0.11  | ** | -0.15  | ** |
|                                       | (0.01) |    | (0.01) |    | (0.01) |    |
| 90-94 (Women)                         | -0.26  | ** | -0.17  | ** | -0.24  | ** |
|                                       | (0.01) |    | (0.01) |    | (0.01) |    |
| 95-99 (Women)                         | -0.35  | ** | -0.19  | ** | -0.33  | ** |
|                                       | (0.01) |    | (0.01) |    | (0.01) |    |
| > 99 (Women)                          | -0.43  | ** | -0.21  | ** | -0.31  | ** |
|                                       | (0.02) |    | (0.02) |    | (0.02) |    |
| 70-74 (Men)                           | -0.01  |    | 0.01   |    | -0.01  |    |
|                                       | (0.01) |    | (0.01) |    | (0.01) |    |
| 75-79 (Men)                           | -0.03  |    | -0.01  |    | -0.05  | ** |

|                              |        |    |        |    |        |    |
|------------------------------|--------|----|--------|----|--------|----|
|                              | (0.01) |    | (0.01) |    | (0.01) |    |
| 80-84 (Men)                  | -0.04  | ** | -0.02  |    | -0.11  | ** |
|                              | (0.01) |    | (0.01) |    | (0.01) |    |
| 85-89 (Men)                  | -0.05  | ** | -0.03  | ** | -0.19  | ** |
|                              | (0.01) |    | (0.01) |    | (0.01) |    |
| 90-94 (Men)                  | -0.06  | ** | -0.04  | ** | -0.30  | ** |
|                              | (0.01) |    | (0.01) |    | (0.01) |    |
| 95-99 (Men)                  | -0.06  | ** | -0.02  |    | -0.39  | ** |
|                              | (0.02) |    | (0.02) |    | (0.02) |    |
| > 99 (Men)                   | -0.12  |    | -0.07  |    | -0.25  | ** |
|                              | (0.05) |    | (0.05) |    | (0.03) |    |
| Male                         | 0.06   | ** | 0.05   | ** | 0.06   | ** |
|                              | (0.01) |    | (0.01) |    | (0.01) |    |
| African American             | -0.08  | ** | -0.05  | ** | -0.07  | ** |
|                              | (0.01) |    | (0.01) |    | (0.01) |    |
| Other Race                   | -0.01  |    | 0.00   |    | 0.00   |    |
|                              | (0.02) |    | (0.02) |    | (0.02) |    |
| Asian                        | 0.04   |    | 0.03   |    | 0.03   |    |
|                              | (0.02) |    | (0.02) |    | (0.02) |    |
| Hispanic                     | 0.00   |    | 0.00   |    | 0.00   |    |
|                              | (0.01) |    | (0.01) |    | (0.01) |    |
| Native American              | -0.05  |    | -0.05  |    | -0.05  |    |
|                              | (0.03) |    | (0.03) |    | (0.03) |    |
| Socioeconomic Level          | 0.02   | ** | 0.00   |    | 0.02   | ** |
|                              | (0.00) |    | (0.00) |    | (0.01) |    |
| <b>Comorbidities</b>         |        |    |        |    |        |    |
| Congestive Heart Failure     | 0.19   | ** | 0.13   | ** | 0.19   | ** |
|                              | (0.00) |    | (0.00) |    | (0.00) |    |
| Cardiac Arrhythmias          | 0.04   | ** | 0.01   |    | 0.04   | ** |
|                              | (0.00) |    | (0.00) |    | (0.00) |    |
| Valvular Heart Disease       | -0.16  | ** | -0.04  | ** | -0.14  | ** |
|                              | (0.01) |    | (0.01) |    | (0.01) |    |
| Pulm. Circulatory Disorder   | -0.04  | ** | -0.04  | ** | -0.04  | ** |
|                              | (0.00) |    | (0.00) |    | (0.00) |    |
| Peripheral Vascular Disorder | 0.08   | ** | -0.04  | ** | 0.07   | ** |
|                              | (0.00) |    | (0.00) |    | (0.00) |    |
| Hypertension                 | -0.06  | ** | -0.02  | ** | -0.05  | ** |
|                              | (0.01) |    | (0.01) |    | (0.01) |    |
| Paralysis                    | -0.05  | ** | -0.04  | ** | -0.05  | ** |
|                              | (0.00) |    | (0.00) |    | (0.00) |    |
| Other Neurologic Disorder    | -0.03  | ** | -0.01  | ** | -0.03  | ** |
|                              | (0.00) |    | (0.00) |    | (0.00) |    |
| Chronic Pulmonary Disease    | 0.00   |    | -0.03  | ** | 0.00   |    |

|                                     |           |    |        |    |        |    |
|-------------------------------------|-----------|----|--------|----|--------|----|
|                                     | (0.00)    |    | (0.00) |    | (0.00) |    |
| Diabetes, Uncomplicated             | -0.07     | ** | -0.04  | ** | -0.07  | ** |
|                                     | (0.01)    |    | (0.01) |    | (0.01) |    |
| Diabetes, Complicated               | -0.01     |    | -0.01  | ** | -0.01  |    |
|                                     | (0.00)    |    | (0.00) |    | (0.00) |    |
| Hypothyroidism                      | 0.00      |    | -0.01  |    | 0.00   |    |
|                                     | (0.00)    |    | (0.00) |    | (0.00) |    |
| Renal Failure                       | -0.23     | ** | -0.10  | ** | -0.21  | ** |
|                                     | (0.02)    |    | (0.02) |    | (0.02) |    |
| Liver Disease                       | -0.03     | ** | -0.03  | ** | -0.03  | ** |
|                                     | (0.01)    |    | (0.01) |    | (0.01) |    |
| Peptic Ulcer Disease                | -0.11     |    | 0.07   |    | -0.07  |    |
|                                     | (0.12)    |    | (0.11) |    | (0.11) |    |
| AIDS                                | -0.11     | ** | -0.03  |    | -0.11  | ** |
|                                     | (0.02)    |    | (0.01) |    | (0.02) |    |
| Lymphoma                            | -0.15     | ** | -0.02  |    | -0.14  | ** |
|                                     | (0.02)    |    | (0.02) |    | (0.02) |    |
| Metastatic Cancer                   | -0.07     | ** | -0.04  | ** | -0.07  | ** |
|                                     | (0.00)    |    | (0.00) |    | (0.00) |    |
| Solid Tumor without Metastases      | -0.02     |    | -0.03  | ** | -0.02  |    |
|                                     | (0.01)    |    | (0.01) |    | (0.01) |    |
| Arthritis/Collagen Vascular Disease | 0.14      | ** | 0.15   | ** | 0.14   | ** |
|                                     | (0.01)    |    | (0.00) |    | (0.01) |    |
| Coagulopathy                        | 0.00      |    | 0.01   |    | 0.00   |    |
|                                     | (0.01)    |    | (0.01) |    | (0.01) |    |
| Obesity                             | -0.12     | ** | 0.04   | ** | -0.11  | ** |
|                                     | (0.01)    |    | (0.01) |    | (0.01) |    |
| Weight Loss                         | -0.01     | ** | 0.02   | ** | -0.01  |    |
|                                     | (0.00)    |    | (0.00) |    | (0.00) |    |
| Fluid, Electrolyte Disorder         | (omitted) |    | omit   |    | omit   |    |
| Blood Loss Anemia                   | -0.14     | ** | -0.14  | ** | -0.14  | ** |
|                                     | (0.01)    |    | (0.00) |    | (0.01) |    |
| Deficiency Anemia                   | 0.02      |    | 0.01   |    | 0.02   |    |
|                                     | (0.01)    |    | (0.01) |    | (0.01) |    |
| Alcohol Abuse                       | -0.09     | ** | -0.07  | ** | -0.08  |    |
|                                     | (0.03)    |    | (0.02) |    | (0.02) |    |
| Drug Abuse                          | -0.08     | ** | -0.04  | ** | -0.07  | ** |
|                                     | (0.01)    |    | (0.01) |    | (0.01) |    |
| Psychosis                           | -0.08     | ** | -0.04  | ** | -0.07  | ** |
|                                     | (0.01)    |    | (0.01) |    | (0.01) |    |

**REGIONAL CHARACTERISTICS**

|                                        |        |    |        |    |        |    |
|----------------------------------------|--------|----|--------|----|--------|----|
| Mid Atlantic                           | 0.13   | ** | -0.05  |    | 0.05   |    |
|                                        | (0.05) |    | (0.04) |    | (0.05) |    |
| South Atlantic                         | 0.02   |    | -0.10  | ** | -0.16  | ** |
|                                        | (0.05) |    | (0.04) |    | (0.04) |    |
| East North Central                     | 0.02   |    | -0.10  | ** | -0.09  |    |
|                                        | (0.05) |    | (0.04) |    | (0.04) |    |
| East South Central                     | 0.11   |    | -0.04  |    | -0.01  |    |
|                                        | (0.05) |    | (0.04) |    | (0.05) |    |
| West North Central                     | -0.15  | ** | -0.25  | ** | -0.49  | ** |
|                                        | (0.05) |    | (0.04) |    | (0.05) |    |
| West South Central                     | 0.17   | ** | 0.03   |    | 0.05   |    |
|                                        | (0.05) |    | (0.04) |    | (0.05) |    |
| Mountain                               | 0.08   |    | 0.02   |    | -0.05  |    |
|                                        | (0.06) |    | (0.05) |    | (0.07) |    |
| Pacific                                | 0.07   |    | 0.01   |    | -0.07  |    |
|                                        | (0.06) |    | (0.05) |    | (0.07) |    |
| Associated Areas                       | -0.25  | ** | omit   |    | -0.66  | ** |
|                                        | (0.08) |    |        |    | (0.12) |    |
| <b><u>TEMPORAL CHARACTERISTICS</u></b> |        |    |        |    |        |    |
| <b>Weekday</b>                         |        |    |        |    |        |    |
| Monday                                 | 0.01   |    | 0.01   |    | 0.00   |    |
|                                        | (0.01) |    | (0.00) |    | (0.01) |    |
| Tuesday                                | 0.00   |    | 0.01   |    | -0.01  |    |
|                                        | (0.01) |    | (0.00) |    | (0.01) |    |
| Wednesday                              | 0.00   |    | 0.01   |    | -0.01  |    |
|                                        | (0.01) |    | (0.00) |    | (0.01) |    |
| Thursday                               | 0.00   |    | 0.02   | ** | 0.00   |    |
|                                        | (0.01) |    | (0.00) |    | (0.01) |    |
| Friday                                 | 0.02   | ** | 0.03   | ** | 0.01   |    |
|                                        | (0.01) |    | (0.00) |    | (0.01) |    |
| Saturday                               | 0.01   |    | 0.01   | ** | 0.00   |    |
|                                        | (0.01) |    | (0.00) |    | (0.01) |    |
| <b>Season</b>                          |        |    |        |    |        |    |
| Spring                                 | 0.01   |    | 0.01   |    | -0.05  | ** |
|                                        | (0.00) |    | (0.00) |    | (0.00) |    |
| Summer                                 | 0.01   | ** | 0.01   | ** | -0.05  | ** |
|                                        | (0.00) |    | (0.00) |    | (0.00) |    |
| Fall                                   | 0.05   | ** | 0.04   | ** | -0.04  | ** |
|                                        | (0.00) |    | (0.00) |    | (0.00) |    |
| <b>Intercept</b>                       | 7.41   | ** | 8.07   | ** | 8.39   | ** |
|                                        | (0.05) |    | (0.05) |    | (0.06) |    |

\*\* = Statistically Significant,  $p < 0.01$
